# Supplementary figures and images for: Building characterization and aerosol infiltration into a naturally ventilated three-story apartment building
Source: Royal Society of Chemistry journal article supplement (doi:10.1039/b907139n), 2009-01-01

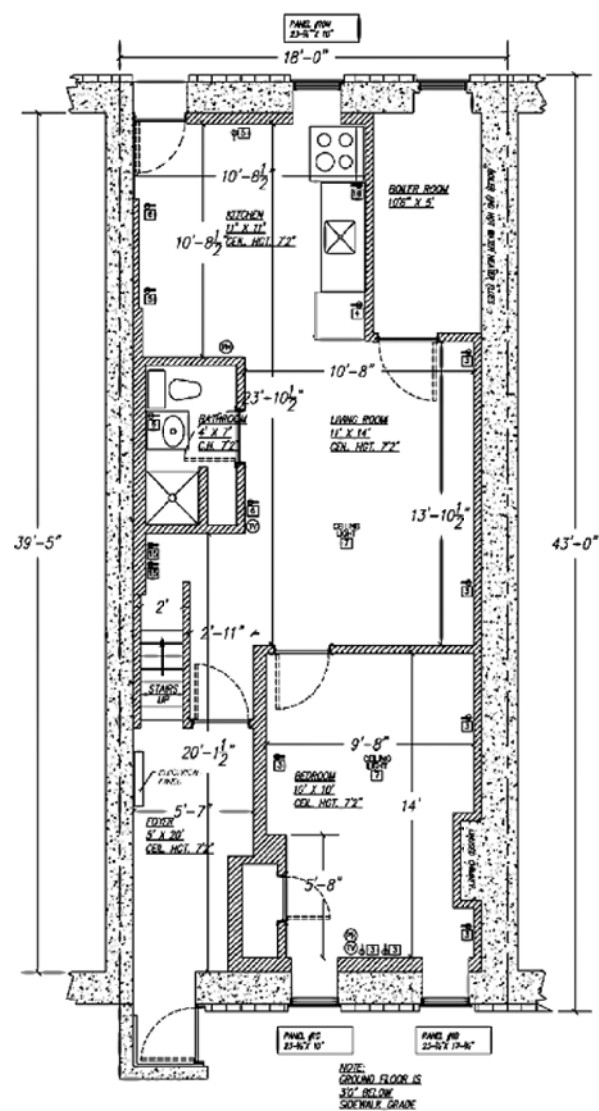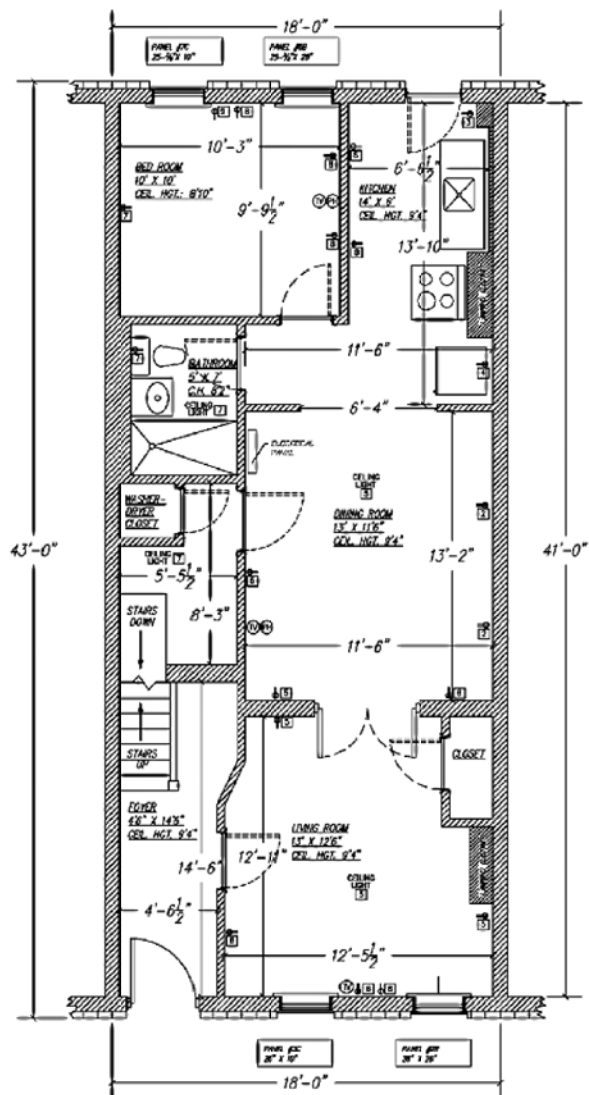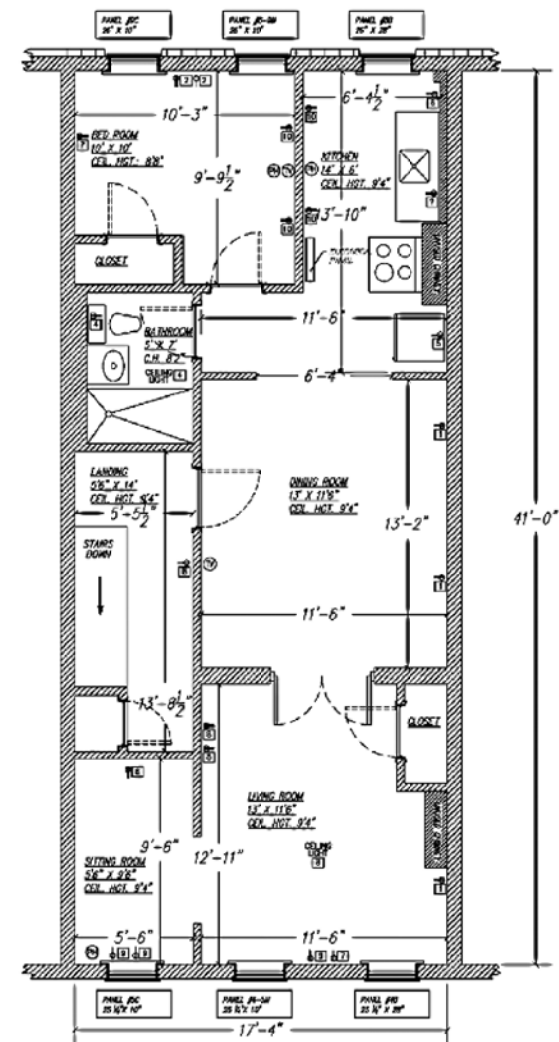

Supplement: b907139n.pdf [file b907139n.pdf]
